# Supplementary material for: Comprehensive analysis of transcriptomics and radiomics revealed the potential of TEDC2 as a diagnostic marker for lung adenocarcinoma
Source: PeerJ journal article supplement (doi:10.7717/peerj.18310), 2024-11-14

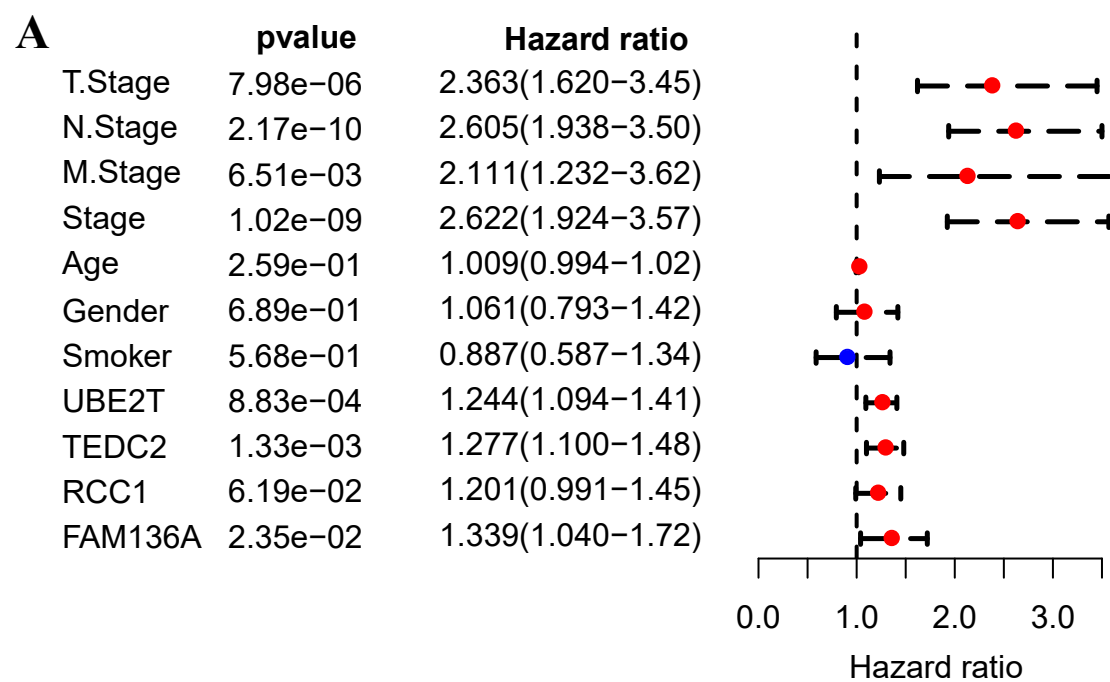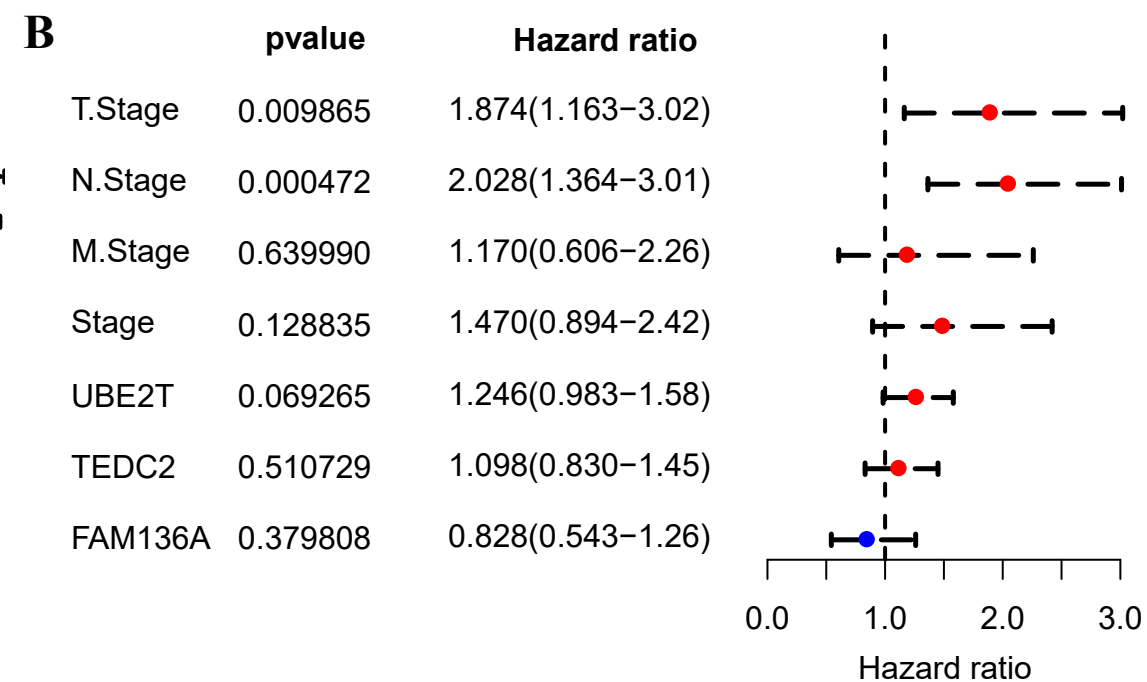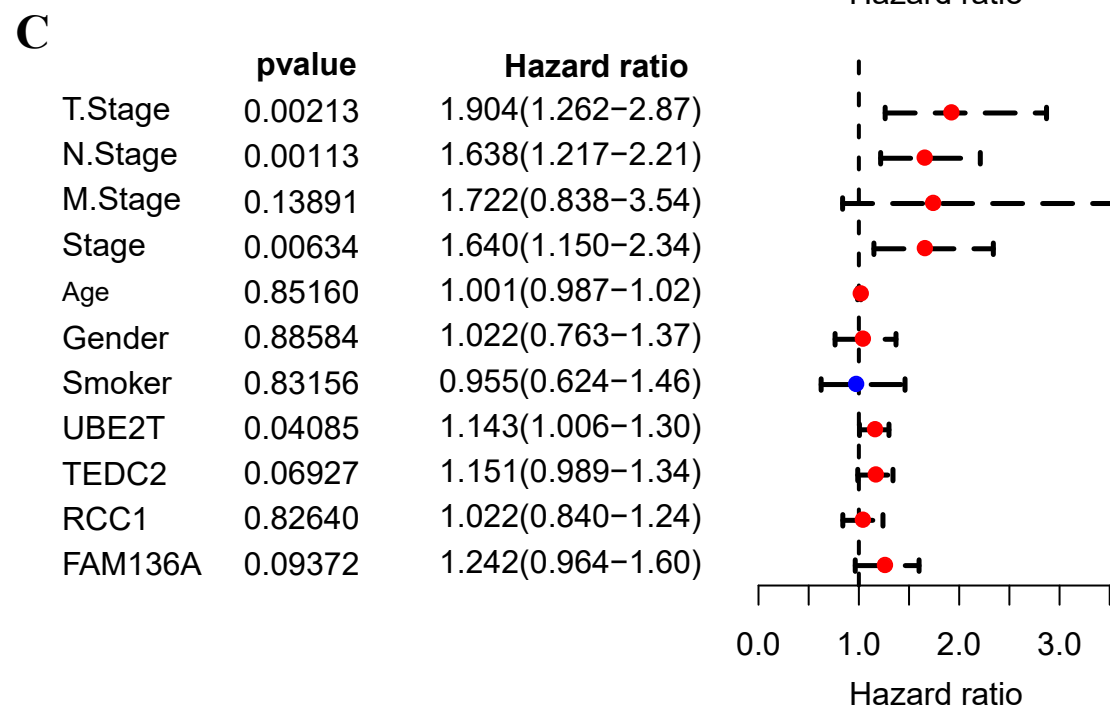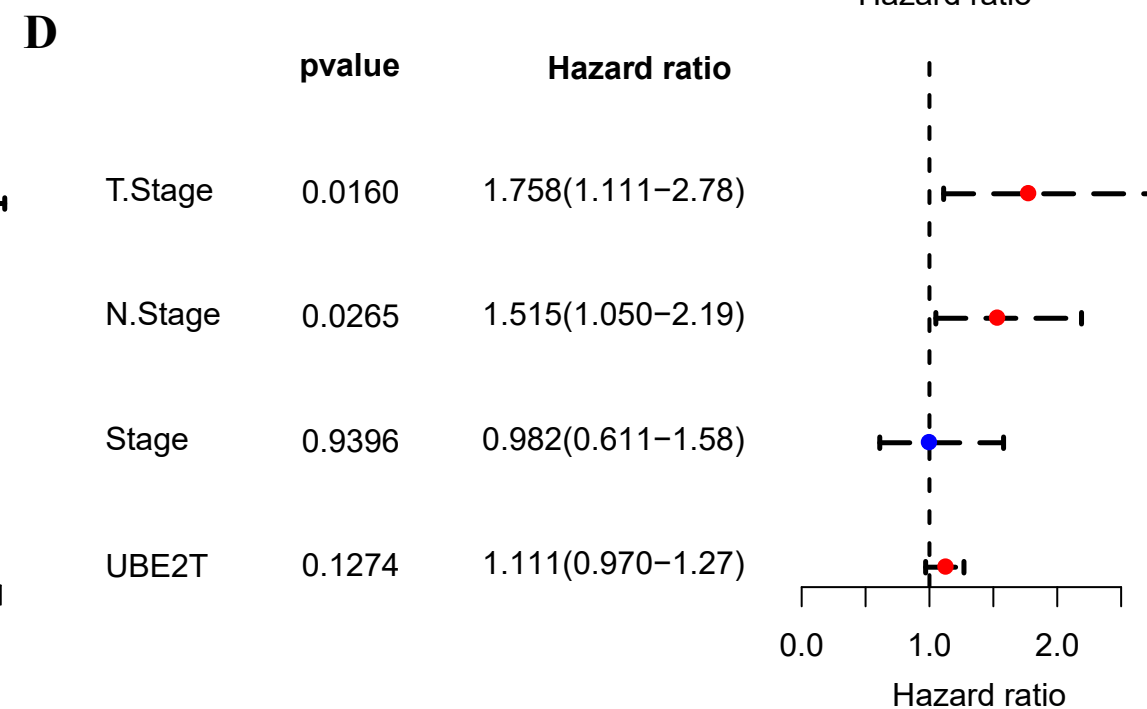

Supplement: Figure_S4.pdf [file Figure_S4.pdf]
