# Supplementary material for: Comprehensive analysis of transcriptomics and radiomics revealed the potential of TEDC2 as a diagnostic marker for lung adenocarcinoma
Source: PeerJ. 2024 Nov 14;12:e18310. doi: 10.7717/peerj.18310 (PMC11569783; doi:10.7717/peerj.18310)
Supplement: Supplemental Information 5 [file peerj-12-18310-s005.xls]

## Sheet: Sheet1
ITEM TO CHECK	IMPORTANCE	CHECKLIST
EXPERIMENTAL DESIGN
Definition of experimental and control groups	E	Line 146-148
Number within each group	E	Line 157
Assay carried out by core lab or investigator's lab?	D	NA
Acknowledgement of authors' contributions	D	NA
SAMPLE
Description	E	Line 148-163
Volume/mass of sample processed	D	NA
Microdissection or macrodissection	E	Line 161-163
Processing procedure	E	Line 148-163
If frozen - how and how quickly?	E	Line 147-148
If fixed - with what, how quickly?	E	NA
Sample storage conditions and duration (especially for FFPE samples)	E	NA
NUCLEIC ACID EXTRACTION
Procedure and/or instrumentation	E	Line 148-163
Name of kit and details of any modifications	E	Line 148-163
Source of additional reagents used	D	NA
Details of DNase or RNAse treatment	E	Line 148-150
Contamination assessment (DNA or RNA)	E	NA
Nucleic acid quantification	E	Line 146-153
Instrument and method	E	Line 148-163
Purity (A260/A280)	D	NA
Yield	D	NA
RNA integrity method/instrument	E	Line 148
RIN/RQI or Cq of 3' and 5' transcripts	E	Line 153-154
Electrophoresis traces	D	NA
Inhibition testing (Cq dilutions, spike or other)	E	Line 269-272
REVERSE TRANSCRIPTION
Complete reaction conditions	E	NA
Amount of RNA and reaction volume	E	NA
Priming oligonucleotide (if using GSP) and concentration	E	NA
Reverse transcriptase and concentration	E	Line 148
Temperature and time	E	NA
Manufacturer of reagents and catalogue numbers	D	Line 146-151
Cqs with and without RT	D*	NA
Storage conditions of cDNA	D	NA
qPCR TARGET INFORMATION
If multiplex, efficiency and LOD of each assay.	E	NA
Sequence accession number	E	NA
Location of amplicon	D	NA
Amplicon length	E	NA
In silico specificity screen (BLAST, etc)	E	Line 109-116
Pseudogenes, retropseudogenes or other homologs?	D	NA
Sequence alignment	D	NA
Secondary structure analysis of amplicon	D	NA
Location of each primer by exon or intron (if applicable)	E	NA
What splice variants are targeted?	E	Line 155
qPCR OLIGONUCLEOTIDES
Primer sequences	E	Table 1
RTPrimerDB Identification Number	D	NA
Probe sequences	D**	NA
Location and identity of any modifications	E	NA
Manufacturer of oligonucleotides	D	NA
Purification method	D	NA
qPCR PROTOCOL
Complete reaction conditions	E	Reaction conditions were prereaction at 25°C for 5-10 min, reverse transcription at 42 °C for 30-60 min, and finally termination at 95°C for 5 min.
Reaction volume and amount of cDNA/DNA	E	The final volume was supplemented to 20µL
Primer, (probe), Mg++ and dNTP concentrations	E	Table 1
Polymerase identity and concentration	E	NA
Buffer/kit identity and manufacturer	E	Line 148-152
Exact chemical constitution of the buffer	D	NA
Additives (SYBR Green I, DMSO, etc.)	E	NA
Manufacturer of plates/tubes and catalog number	D	NA
Complete thermocycling parameters	E	NA
Reaction setup (manual/robotic)	D	NA
Manufacturer of qPCR instrument	E	Line 151
qPCR VALIDATION
Evidence of optimisation (from gradients)	D	NA
Specificity (gel, sequence, melt, or digest)	E	NA
For SYBR Green I, Cq of the NTC	E	NA
Standard curves with slope and y-intercept	E	NA
PCR efficiency calculated from slope	E	NA
Confidence interval for PCR efficiency or standard error	D	NA
r2 of standard curve	E	NA
Linear dynamic range	E	NA
Cq variation at lower limit	E	NA
Confidence intervals throughout range	D	NA
Evidence for limit of detection	E	NA
If multiplex, efficiency and LOD of each assay.	E	NA
DATA ANALYSIS
qPCR analysis program (source, version)	E	NA
Cq method determination	E	Line 152
Outlier identification and disposition	E	NA
Results of NTCs	E	NA
Justification of number and choice of reference genes	E	Line 152
Description of normalisation method	E	Line 151-152
Number and concordance of biological replicates	D	NA
Number and stage (RT or qPCR) of technical replicates	E	NA
Repeatability (intra-assay variation)	E	NA
Reproducibility (inter-assay variation, %CV)	D	NA
Power analysis	D	NA
Statistical methods for result significance	E	Line 166-170
Software (source, version)	E	Line 166-170
Cq or raw data submission using RDML	D	NA
Table 1. MIQE checklist for authors, reviewers and editors. All essential information (E) must be submitted with the manuscript. Desirable
information (D) should be submitted if available. If using primers obtained from RTPrimerDB, information on qPCR target, oligonucleotides,
protocols and validation is available from that source.
*: Assessing the absence of DNA using a no RT assay is essential when first extracting RNA. Once the sample has been validated as
RDNA-free, inclusion of a no-RT control is desirable, but no longer essential.
**: Disclosure of the probe sequence is highly desirable and strongly encouraged. However, since not all commercial pre-designed assay
vendors provide this information, it cannot be an essential requirement. Use of such assays is advised against.
