# Supplementary material for: Comprehensive analysis of transcriptomics and radiomics revealed the potential of TEDC2 as a diagnostic marker for lung adenocarcinoma
Source: PeerJ. 2024 Nov 14;12:e18310. doi: 10.7717/peerj.18310 (PMC11569783; doi:10.7717/peerj.18310)
Supplement: Supplemental Information 6 [file peerj-12-18310-s006.xlsx]

## Sheet: RESULT
		Cq	Cq Mean	target gene				expression	average		p value
BEAS-2B	GAPDH	14.77	14.8033	21.35	6.54667	6.53333	0.0133333	0.990801	1.00017	0.0224114		UBE2T
BEAS-2B	GAPDH	14.88	14.8033	21.36	6.55667	6.53333	0.0233333	0.983957
BEAS-2B	GAPDH	14.76	14.8033	21.3	6.49667	6.53333	-0.0366667	1.02574
A549	GAPDH	14.79	14.8267	20.42	5.59333	6.53333	-0.94	1.91853	1.9014	0.0545228	1.20877e-05
A549	GAPDH	14.83	14.8267	20.4	5.57333	6.53333	-0.96	1.94531
A549	GAPDH	14.86	14.8267	20.48	5.65333	6.53333	-0.88	1.84038
BEAS-2B	GAPDH	14.77	14.8033	26.66	11.8567	11.8467	0.01	0.993092	1.00552	0.129478		TEDC2
BEAS-2B	GAPDH	14.88	14.8033	26.83	12.0267	11.8467	0.18	0.882703
BEAS-2B	GAPDH	14.76	14.8033	26.46	11.6567	11.8467	-0.19	1.14076
A549	GAPDH	14.79	14.8267	25.83	11.0033	11.8467	-0.843333	1.79419	1.88053	0.0918403	0.00067222
A549	GAPDH	14.83	14.8267	25.77	10.9433	11.8467	-0.903333	1.87038
A549	GAPDH	14.86	14.8267	25.69	10.8633	11.8467	-0.983333	1.97703
BEAS-2B	GAPDH	14.77	14.8033	23.88	9.07667	8.72333	0.353333	0.782773	1.0146	0.202139		RCC1
BEAS-2B	GAPDH	14.88	14.8033	23.38	8.57667	8.72333	-0.146667	1.10701
BEAS-2B	GAPDH	14.76	14.8033	23.32	8.51667	8.72333	-0.206667	1.15402
A549	GAPDH	14.79	14.8267	22.92	8.09333	8.72333	-0.63	1.54756	1.5024	0.053085	0.0155691
A549	GAPDH	14.83	14.8267	23.02	8.19333	8.72333	-0.53	1.44393
A549	GAPDH	14.86	14.8267	22.95	8.12333	8.72333	-0.6	1.51572
BEAS-2B	GAPDH	14.77	14.8033	32.6	17.7967	17.66	0.136667	0.909618	1.00373	0.106845		FAM136A
BEAS-2B	GAPDH	14.88	14.8033	32.3	17.4967	17.66	-0.163333	1.11987
BEAS-2B	GAPDH	14.76	14.8033	32.49	17.6867	17.66	0.0266667	0.981686
A549	GAPDH	14.79	14.8267	31.54	16.7133	17.66	-0.946667	1.92741	1.98319	0.44814	0.0211596
A549	GAPDH	14.83	14.8267	31.84	17.0133	17.66	-0.646667	1.56555
A549	GAPDH	14.86	14.8267	31.19	16.3633	17.66	-1.29667	2.45661

## Sheet: RAW DATA
Hole	Channel	CT vaule	TM vaule	Type	Target genes	Sample	Housekeeper genes	Control sample	Channel genes
A01	FAM	21.35	82	Unknown	UBE2T	BEAS-2B
A02	FAM	21.36	82	Unknown	UBE2T	BEAS-2B
A03	FAM	21.3	82	Unknown	UBE2T	BEAS-2B
A04	FAM	20.42	82	Unknown	UBE2T	A549
A05	FAM	20.4	82	Unknown	UBE2T	A549
A06	FAM	20.48	82	Unknown	UBE2T	A549
B01	FAM	26.66	86.5	Unknown	TEDC2	BEAS-2B
B02	FAM	26.83	86.5	Unknown	TEDC2	BEAS-2B
B03	FAM	26.46	86.5	Unknown	TEDC2	BEAS-2B
B04	FAM	25.83	86	Unknown	TEDC2	A549
B05	FAM	25.77	86	Unknown	TEDC2	A549
B06	FAM	25.69	86	Unknown	TEDC2	A549
C01	FAM	23.88	88.5	Unknown	RCC1	BEAS-2B
C02	FAM	23.38	88.5	Unknown	RCC1	BEAS-2B
C03	FAM	23.32	88.5	Unknown	RCC1	BEAS-2B
C04	FAM	22.92	88.5	Unknown	RCC1	A549
C05	FAM	23.02	88.5	Unknown	RCC1	A549
C06	FAM	22.95	88.5	Unknown	RCC1	A549
D01	FAM	32.6	83	Unknown	FAM136A	BEAS-2B
D02	FAM	32.3	83.5	Unknown	FAM136A	BEAS-2B
D03	FAM	32.49	83.5	Unknown	FAM136A	BEAS-2B
D04	FAM	31.54	83.5	Unknown	FAM136A	A549
D05	FAM	31.84	83.5	Unknown	FAM136A	A549
D06	FAM	31.19	87.5	Unknown	FAM136A	A549
E01	FAM	14.77	87	Unknown	GAPDH	BEAS-2B
E02	FAM	14.88	87	Unknown	GAPDH	BEAS-2B
E03	FAM	14.76	87	Unknown	GAPDH	BEAS-2B
E04	FAM	14.79	87	Unknown	GAPDH	A549
E05	FAM	14.83	87	Unknown	GAPDH	A549
E06	FAM	14.86	87	Unknown	GAPDH	A549

## Sheet: cell numbers
A549		si-NC	si-TEDC2	P
	Migration	996	301	0.00361466
		862	278
		831	246
	Invasion	812	102	0.00109294
		779	129
		696	145
